# Supplementary material for: The effectiveness of genomic selection for milk production traits of Holstein dairy cattle
Source: PubMed Central journal article supplement (PMC7054615; doi:10.5713/ajas.19.0546), 2019-12-24
Supplement: ajas-19-0546-suppl.pdf [file ajas-19-0546-suppl.pdf]

## Supplementary tables

**Table S1**

Quality control of single nucleotide polymorphism (SNP) dataset.

| Description                             | No. of heads and SNPs |
|-----------------------------------------|-----------------------|
| Total number of animals                 | 2,090                 |
| Animals with missing rate over 0.10%    | 83                    |
| Selected animals                        | 2,007                 |
| Total no. of SNPs                       | 50,908                |
| SNPs with unknown position              | 536                   |
| SNPs on sex chromosome (X, Y)           | 1,139                 |
| Total number of SNPs on autosome (1~29) | 49,233                |
| Outlier SNPs                            | 7,396                 |
| Useful SNPs                             | 41,837                |

**Table S2**

No. of records (percentage), cows, means and standard deviations for 305-days milk, fat and protein yields (kg) by parity

| Parity  | No. of records (%) | Cows<br>(with SNP)         | Heifers<br>with SNP | Milk production traits (kg) |        |         |
|---------|--------------------|----------------------------|---------------------|-----------------------------|--------|---------|
|         |                    |                            |                     | Milk                        | Fat    | Protein |
| 1       | 293,855 ( 58)      | 293,855 (789)              | -                   | 8603±1605                   | 328±68 | 273±50  |
| 2       | 137,471 ( 27)      | 137,471 (469)              | -                   | 10048±1916                  | 378±80 | 320±59  |
| 3       | 75,155 ( 15)       | 75,155 (279)               | -                   | 10547±1987                  | 398±83 | 334±61  |
| Overall | 50,6481 (100)      | 293,855 (789) <sup>1</sup> | 794                 | 9284±1934                   | 352±79 | 295±60  |

<sup>1</sup>Total number of cows, not the column sum.

**Tables S3**

Regression coefficients of integrated EBV to the GEBV for milk production traits in each group with SNP information.

| Traits                                | Traits  | $\beta \pm se$ | $r^2$ | t Value | Pr> t  |
|---------------------------------------|---------|----------------|-------|---------|--------|
| Overall<br>(1730 heads)               | Milk    | 0.9075±0.0137  | 0.72  | 66.05   | <.0001 |
|                                       | Fat     | 0.9202±0.0128  | 0.75  | 71.97   | <.0001 |
|                                       | Protein | 0.9012±0.0138  | 0.71  | 65.37   | <.0001 |
| Cows with record<br>(749 heads)       | Milk    | 0.9210±0.0166  | 0.80  | 55.35   | <.0001 |
|                                       | Fat     | 0.9511±0.0155  | 0.84  | 61.51   | <.0001 |
|                                       | Protein | 0.9262±0.0180  | 0.78  | 51.57   | <.0001 |
| Sires with progeny<br>(287 heads)     | Milk    | 0.9400±0.0193  | 0.89  | 48.66   | <.0001 |
|                                       | Fat     | 0.9519±0.0161  | 0.93  | 59.27   | <.0001 |
|                                       | Protein | 0.9378±0.0190  | 0.90  | 49.40   | <.0001 |
| Heifers without record<br>(602 heads) | Milk    | 0.8638±0.0376  | 0.47  | 23.00   | <.0001 |
|                                       | Fat     | 0.8267±0.0370  | 0.45  | 22.35   | <.0001 |
|                                       | Protein | 0.8424±0.0347  | 0.50  | 24.29   | <.0001 |
| Bulls without progeny<br>(92 heads)   | Milk    | 0.5818±0.1240  | 0.20  | 4.69    | <.0001 |
|                                       | Fat     | 0.5348±0.0983  | 0.25  | 5.44    | <.0001 |
|                                       | Protein | 0.6047±0.1007  | 0.29  | 6.01    | <.0001 |

**Tables S4**

Genetic gains of fat yield (kg) per year by the selection method and group.

| group                     | Parity | $\sigma_a$ | $i$  | $r_{GP_{ssBLUP}}(r_{GP_{BLUP}})$ | $L$ | $\Delta G_1(\Delta G_2)$ | IR   |
|---------------------------|--------|------------|------|----------------------------------|-----|--------------------------|------|
| Cows<br>with record       | 1      | 25         | 0.2  | 0.72 (0.67)                      | 4.2 | 0.9 (0.8)                | 7.5  |
|                           | 2      | 30         | 0.2  | 0.71 (0.66)                      | 4.2 | 1.0 (1.0)                | 7.7  |
|                           | 3      | 29         | 0.2  | 0.70 (0.64)                      | 4.2 | 1.0 (0.9)                | 8.0  |
|                           | Mean   |            |      |                                  |     |                          | 7.7  |
| Sires<br>with progeny     | 1      | 25         | 2.06 | 0.86 (0.84)                      | 8.1 | 5.5 (4.4)                | 2.1  |
|                           | 2      | 30         | 2.06 | 0.85 (0.82)                      | 8.1 | 6.5 (6.3)                | 2.9  |
|                           | 3      | 29         | 2.06 | 0.83 (0.81)                      | 8.1 | 6.2 (6.0)                | 3.0  |
|                           | Mean   |            |      |                                  |     |                          | 2.7  |
| Heifers<br>without record | 1      | 25         | 0.2  | 0.62 (0.50)                      | 4.2 | 0.7 (0.6)                | 23.3 |
|                           | 2      | 30         | 0.2  | 0.61 (0.49)                      | 4.2 | 0.9 (0.7)                | 24.2 |
|                           | 3      | 29         | 0.2  | 0.59 (0.48)                      | 4.2 | 0.8 (0.7)                | 23.4 |
|                           | Mean   |            |      |                                  |     |                          | 23.6 |
| Bulls<br>without progeny  | 1      | 25         | 2.06 | 0.62 (0.47)                      | 8.1 | 4.0 (3.0)                | 33.1 |
|                           | 2      | 30         | 2.06 | 0.61 (0.46)                      | 8.1 | 4.7 (3.5)                | 32.7 |
|                           | 3      | 29         | 2.06 | 0.60 (0.45)                      | 8.1 | 4.5 (3.5)                | 34.2 |
|                           | Mean   |            |      |                                  |     |                          | 33.3 |

$\sigma_a$ , genetic standard deviation;  $i$ , selection intensity;  $r_{GP_{ssBLUP}}(r_{GP_{BLUP}})$ , accuracy;  $L$ , generation interval;  $\Delta G_1 = ssBLUP(\Delta G_2 = BLUP)$ , genetic gain; IR, increase rate (%)

**Tables S5**

Genetic gains of protein yield (kg) per year by the selection method and group.

| Group                     | Parity | $\sigma_a$ | $i$  | $r_{GP_{ssBLUP}}(r_{GP_{BLUP}})$ | $L$ | $\Delta G_1(\Delta G_2)$ | IR   |
|---------------------------|--------|------------|------|----------------------------------|-----|--------------------------|------|
| Cows<br>with record       | 1      | 18         | 0.2  | 0.70 (0.65)                      | 4.2 | 0.6 (0.5)                | 8.0  |
|                           | 2      | 20         | 0.2  | 0.69 (0.63)                      | 4.2 | 0.7 (0.6)                | 8.4  |
|                           | 3      | 20         | 0.2  | 0.66 (0.61)                      | 4.2 | 0.6 (0.6)                | 9.0  |
|                           | Mean   |            |      |                                  |     |                          | 8.5  |
| Sires<br>with progeny     | 1      | 18         | 2.06 | 0.85 (0.83)                      | 8.1 | 3.8 (3.7)                | 2.2  |
|                           | 2      | 20         | 2.06 | 0.82 (0.80)                      | 8.1 | 4.2 (4.1)                | 3.1  |
|                           | 3      | 20         | 2.06 | 0.80 (0.77)                      | 8.1 | 0.4 (3.9)                | 3.3  |
|                           | Mean   |            |      |                                  |     |                          | 2.8  |
| Heifers<br>without record | 1      | 18         | 0.2  | 0.60 (0.49)                      | 4.2 | 0.5 (0.4)                | 22.5 |
|                           | 2      | 20         | 0.2  | 0.58 (0.47)                      | 4.2 | 0.6 (0.5)                | 24.3 |
|                           | 3      | 20         | 0.2  | 0.57 (0.46)                      | 4.2 | 0.5 (0.4)                | 23.4 |
|                           | Mean   |            |      |                                  |     |                          | 23.4 |
| Bulls<br>without progeny  | 1      | 18         | 2.06 | 0.61 (0.46)                      | 8.1 | 2.7 (2.1)                | 32.7 |
|                           | 2      | 20         | 2.06 | 0.59 (0.44)                      | 8.1 | 3.0 (2.2)                | 35.7 |
|                           | 3      | 20         | 2.06 | 0.57 (0.42)                      | 8.1 | 2.9 (2.1)                | 35.4 |
|                           | Mean   |            |      |                                  |     |                          | 34.6 |

$\sigma_a$ , genetic standard deviation;  $i$ , selection intensity;  $r_{GP_{ssBLUP}}(r_{GP_{BLUP}})$ , accuracy;  $L$ , generation interval;  
 $\Delta G_1 = ssBLUP(\Delta G_2 = BLUP)$ , genetic gain; IR, increase rate (%)
